# Supplementary material
Source: PubMed Central journal article supplement (PMC6944747)
Supplement: NIHMS1540022-supplement-Supp_1.pdf [file NIHMS1540022-supplement-Supp_1.pdf]

# Treatment strategies and risk of central nervous system recurrence in high-grade B-cell and Burkitt lymphoma

**Authors:** Dominic P Decker, MD <sup>1,2</sup>  
Pamela C Egan, MD <sup>1,2,3</sup>  
Adam S Zayac, MD <sup>1,2,3</sup>  
Diana O Treaba, MD <sup>1,4</sup>  
Adam J Olszewski, MD <sup>1,2,3</sup>

## Affiliations

<sup>1</sup> The Warren Alpert Medical School of Brown University, Providence, RI

<sup>2</sup> Department of Medicine, Rhode Island Hospital, Providence, RI

<sup>3</sup> Division of Hematology-Oncology, Rhode Island Hospital, Providence, RI

<sup>4</sup> Department of Pathology, Rhode Island Hospital, Providence, RI

**Corresponding author:** Adam J Olszewski, MD  
Rhode Island Hospital  
Address: 593 Eddy St  
Providence, RI, 02903  
Phone: (401) 444 5435  
Email: adam\_olszewski@brown.edu

**Supplemental Table S1.** Characteristics of patients with Burkitt and high-grade B-cell lymphoma

(HGBCL) included in the study.

| <b>Variable</b>                          | <b>All cases<br/>(n=64)</b> | <b>HGBCL<br/>(n=26)</b> | <b>Burkitt<br/>(n=38)</b> | <b>P</b> |
|------------------------------------------|-----------------------------|-------------------------|---------------------------|----------|
| Age, median (IQR)                        | 57 (45-70)                  | 61 (50-70)              | 52 (39-70)                | .12      |
| Male sex, n (%)                          | 47 (73%)                    | 15 (58%)                | 32 (84%)                  | .024     |
| Race: white, n (%)                       | 56 (88%)                    | 21 (81%)                | 35 (92%)                  | .27      |
| HIV positive, n(%)                       | 13 (20%)                    | 2 (8%)                  | 11 (29%)                  | .057     |
| CD4, median (cells per mm <sup>3</sup> ) | 321                         | 241                     | 322                       | .39      |
| Performance status, n(%)                 |                             |                         |                           |          |
| ECOG >2                                  | 4 (6%)                      | 1 (4%)                  | 3 (8%)                    | .64      |
| International Prognostic Index           |                             |                         |                           |          |
| 0-2                                      | 30 (47%)                    | 12 (46%)                | 18 (47%)                  | .99      |
| 3-5                                      | 34 (53%)                    | 14 (54%)                | 20 (53%)                  |          |
| Stage, n(%)                              |                             |                         |                           |          |
| I/II                                     | 17 (27%)                    | 7 (27%)                 | 10 (26%)                  | .99      |
| III/IV/unrecorded                        | 47 (73%)                    | 19 (73%)                | 28 (74%)                  |          |
| Baseline involvement:                    |                             |                         |                           |          |
| GI tract                                 | 15 (23%)                    | 5 (19%)                 | 10 (26%)                  | .56      |
| Bone marrow                              | 22 (34%)                    | 8 (31%)                 | 14 (37%)                  | .79      |
| CNS                                      | 9 (14%)                     | 1 (4%)                  | 8 (21%)                   | .071     |
| LDH, IU median (IQR)                     | 473 (214-1153)              | 271 (198-626)           | 610 (264-1464)            | .08      |
| First-line regimen:                      |                             |                         |                           |          |
| CODOX-M/IVAC ±R                          | 13 (20%)                    | 3 (12%)                 | 10 (26%)                  | .04      |
| Hyper-CVAD ±R                            | 11 (17%)                    | 1 (4%)                  | 10 (26%)                  |          |
| DA-EPOCH-R                               | 14 (22%)                    | 9 (35%)                 | 5 (13%)                   |          |
| R-CHOP                                   | 10 (16%)                    | 6 (23%)                 | 4 (11%)                   |          |
| Other high-intensity ±R                  | 8 (13%)                     | 3 (12%)                 | 5 (13%)                   |          |
| Palliative care only                     | 8 (13%)                     | 4 (15%)                 | 4 (11%)                   |          |
| Intrathecal prophylaxis                  | 44 (69%)                    | 12 (46%)                | 32 (84%)                  | .002     |
| Best response:                           |                             |                         |                           |          |
| Complete remission                       | 40 (67%)                    | 14 (61%)                | 26 (70%)                  | .09      |
| Partial remission                        | 5 (8%)                      | 3 (13%)                 | 2 (5%)                    |          |
| Progression/early death                  | 15 (25%)                    | 6 (26%)                 | 9 (25%)                   |          |
